# Supplementary material for: Biodiversity of rolB/C-like Natural Transgene in the Genus Vaccinium L. and Its Application for Phylogenetic Studies
Source: Int J Mol Sci. 2023 Apr 8;24(8):6932. doi: 10.3390/ijms24086932 (PMC10138537; doi:10.3390/ijms24086932)
Supplement: Supplementary file 1 [file ijms-24-06932-s001.zip]

Archive with 4 entries (4 files):
- Supplementary Figures (1).pdf
- Table S1 (1).xlsx
- Table S2 (2).xlsx
- Table S3.xlsx
