# Supplementary material for: Biodiversity of rolB/C-like Natural Transgene in the Genus Vaccinium L. and Its Application for Phylogenetic Studies
Source: Int J Mol Sci. 2023 Apr 8;24(8):6932. doi: 10.3390/ijms24086932 (PMC10138537; doi:10.3390/ijms24086932)
Supplement: Supplementary file 1 [file ijms-24-06932-s001.zip › Table S1 (1).xlsx]

## Sheet: Лист1
Table S1.Amino-acid sequences of various Plast-proteins from defferent species
Name of protein	Source	Amino Acid sequence
RolB/C-like	Vaccinium macrocarpon	MWKRGLPTSKFQAIDLLEVDSREELKAAIDYAGGRYRDFLDLQRKDQLDWATKRKPFAKGSQDGELRALIDRRLKTQQEYWTRYSIHGVNDTVLPHAPLLYTYMSKERLREHLEKKGLRVSAGAQRTELNQIGVFPRGPYGTTIPPFSEEVGQNAAARSFYGIEYSLDAVPRPSDPKPPRPAISTEYFVMFAQTTGFSPKGRLSFQKMQAGFAVTFDHYALATPDLLVGSYLDYDIVAYGRNFMPKEIKGTLVARNNTGEQVAPVRNPATMQPIAVAGFNTVNTITLMRTGQ
RolB/C-like	Vaccinium uliginosum	MWKRGLPTSKFQPIDLLEVDSREELKAAIEYAGGRYRDFLDLQRADQLDWATRRKPFAKGAGDGELRAVIDRRLDPRKKQEYWTRYSIHGVTDTVLPQAPMLYTYMSKERLREHLDKKGLRVSAGAQRTELNQIGEFPRGPYGTTIPPYSEDVGQNAAARSFYGIEYSLDAVLRPSDPNPPRLAISTEYFVMFAQTTGFSPKGRLSFQKMQAGFAATFDHYALATPDLPVGSYLDYDIVAYGRNFMPKEIKGTLVARNNTGEQVAPVRNPATMQKIPVAGFNTVNTITVMRTGQ
RolB/C-like	Vaccinium vitis-idaea	MWKRGLPTSKFQPIDLEVDSREELKAAIEYAGGRYRDFLDLQRKDQIDWATRRKPFAKGPQDGELRALIDRRLKTQEYWTRYSIHGVKDTVLPHAPLLYTYMSKERLHEHLEKKGLRVSAGAQRTELNQIGEFPRGPYGTTIPPYSEEVGQNAAARSFYGIEYSLDAVPRPSDPKPPRPAISTDYFVMFAQTTGFSPKGRLSFQKMHAGFAVTFDHYALATPDLPVGSYLDYDIVAYGRNFMPKEIKGTLVARNNTGEQVAPVRNPATMQPIAVAGFNTVNTITLMRTGQ
RolB/C-like	Laccaria trichodermophora	MWKRGLPTSKFTPVNCTGITNTVQLENALNYARDMYKKHVEWIYTEQLEWATTRLPFLHGPNDTPIRAKAQWIIKQKRLTPRYEPFGQKRYEPGQPQDALHEIQDTILIDAQPLFIYSSANRVKEQVTHQGLRVSRGAERIYQHQQGSFPVGPYGTTISPHRQDVSQAATRREFFDIEWSLPSINADPTVMRTSIPTDHWVMFIPTTGFSPKGRLIFSCLDSGFNETFDHYAMATPHLSPGSYLSHDVVAFGDTLIPEEIPGTQIARINTGE
RolB/C-like	Nyssa sinensis	MAHRGFPHPAFTPVDLTGVHSTDELQMQIGLAFDAYAEHLETVRRRQKTWAMRVKNFLKDPADATHLALANRRIASDEHWVRYTLPTDPQDTLLPTAQPLFTYSGEERIMAQVQHGLRVSGGADRVYQHQRGHFPKGPYGTTIAPFSQTVSLNAMRREFFDIEFSLPNVPRSFEQQRQALPMNHFIAFIPSTGFSPKGQLVFRRLDSGFEERFDHFALSTPHLNVGDYLKYDIVAYGPTLIPEEIPGTEVARNNTGEDRVLLKVNPA
RolB	Rhizobium rhizogenes	MAPRSLFLQRFQPRDLTKAWNQLNLFDEIQFAFLIYSQVYSKTLMDFQKRWAQGVLDLEENAPPVVILKQLAHLLKNKVCYHPPMLVDHPDLARENDRHVFVYLSREKMQKVLEEKSITFGLEAVLATTMQPYRSDLVLQEMVRAHNIAWPHRRVEEPDLEGFIAIFASTLFIHLLELKVTNVYGREVACTFFVRQGTGNRSYDVIACGITQFTKNAGVMPRPAVPSPEPDLTLRLSGPNQKREEGDMKPAIVNLKKETSAT
ORF13	Rhizobium rhizogenes	MARSYGSSRRFHIDEFRWIKEPTRLKAQLLNVVEAHKSAQRETLKYYIPSAAEHWAHAEAAYVNDAEMELHQAGWKYPLSFVFTSLDVAKACKENKHLLCKEDSDGQLFACAVPPYQTNVSLAALREIHNSVSGGEYQEEEDMDYFVAIFPNENFNYESCEIVTRSGGKGICKIYSRELGEPLAYDAILAIGKVLLE
6b	Agrobacterium tumefaciens	MTVANWQVRDLTLILRTGEMQSRLEQARTDFGALLPETVYFQPSAIRLGEFDDEYILTRQELVYVYLREDIARQCALRRHLPSNSSNSGIMATAIPPWLMDARRLNRVMQERCDQGGLVHYYQGLHTNQFFLAIMPSNCFVRFGTDVINNENYGFYARGGNYTEEGEDDDDEMDDEDETGGAETRDSQTGNLINYPIIALGSCHLSA
