# Supplementary material for: Biodiversity of rolB/C-like Natural Transgene in the Genus Vaccinium L. and Its Application for Phylogenetic Studies
Source: Int J Mol Sci. 2023 Apr 8;24(8):6932. doi: 10.3390/ijms24086932 (PMC10138537; doi:10.3390/ijms24086932)
Supplement: Supplementary file 1 [file ijms-24-06932-s001.zip › Table S2 (2).xlsx]

## Sheet: Лист1
Table S2.Description of the plant material used in the work.
Species	Collection number	Collection point	Description of the collection point	Collection date	Collector
V. oxycoccos L.	VO1	2km southwest of Pastorskoye Lake, Leningrad Region, Russia	Sphagnum swamp	May-2020	Katsapov I
	VO2	Shore of Pastorskoe Lake, Leningrad region, Russia	Sphagnum swamp	May-2020	Katsapov I
	VO3	Shore of the swamp Lammin Suo, Leningrad region, Russia	Sphagnum swamp	May-2020	Katsapov I
	VO7	Vaganovo village, Rakhinskoye urban settlement, Vsevolozhsky district, Leningrad region, Russia	Sphagnum swamp	Aug-2020	Katsapov I
	1	Near the village of Kirillovskoye, Vyborgsky district, Leningrad region.	Sphagnum swamp	Sept-2021	Matveeva T.V., Sokornova S,V.
	2	Near the village of Kirillovskoye, Vyborgsky district, Leningrad region.	Sphagnum swamp	Sept-2021	Matveeva T.V., Sokornova S,V.
	LO3	Near the village of Nikolskoe, Gatchinskydistrict, Leningrad region.	Sphagnum swamp	Sept-2018	Porokhoviniva E.A.
	LO4	Near the village of Nikolskoe, Gatchinskydistrict, Leningrad region.	Sphagnum swamp	Sept-2018	Porokhoviniva E.A.
	SO9	Near the village of Tarasovo, Vyborgsky district, Leningrad region.	Sphagnum swamp	Sept-2021	Sokornova S,V.
	SO11	Near the village of Anterola, Vyborgsky district, Leningrad region.	Sphagnum swamp	Sept-2021	Sokornova S,V.
	TO21	10 km from Vyborg towards Brusnichnoye, Vyborgsky district, Leningrad region.	Sphagnum swamp	2021 11 04	Tikhodeyev O.N.
	TO22	10 km from Vyborg towards Brusnichnoye, Vyborgsky district, Leningrad region.	Sphagnum swamp	2021 11 04	Tikhodeyev O.N.
	OO29	Near the village of Naziya, Kirovsky district, Leningrad region.	Sphagnum swamp	Jul-2021	Kurbatov O. Yu
	30	Sestroretskoe swamp" Leningrad region, Reserve "Raised bog 30 60.71023 N 29.59969 E, Russia	Sphagnum swamp	18-Jul-2021	Antropov D. O.
	N46	Vicinity of the village of Talitsa, Babushkinsky district, Vologda region, Russia	Raised sphagnum bog	08-Aug-2021	Maltsev S. A., Maltseva V. S.
V. vitis-idaea L.	25	Khibiny, Russia	Lichen-shrub tundra, H = 750 m	Jul-2019	Kiselev G. A., Litvinova A. V.
	26	Khibiny, Russia	Lichen-shrub tundra, H = 750 m	Jul-2019	Kiselev G. A., Litvinova A. V.
	27	Khibiny, Russia	Lichen-shrub tundra, H = 750 m	Jul-2019	Kiselev G. A., Litvinova A. V.
	28	Khibiny, Russia	Blueberry-bilberry spruce and birch forests with an admixture of pine, H = 360 m	Jul-2019	Kiselev G. A., Litvinova A. V.
	29	Khibiny, Russia	In the lower part of the birch crooked forest, H = 500 m	Jul-2019	Kiselev G. A., Litvinova A. V.
	30	Khibiny, Russia	In the lower part of the birch crooked forest, H = 500 m	Jul-2019	Kiselev G. A., Litvinova A. V.
	31	Khibiny, Russia	In the lower part of the birch crooked forest, H = 500 m	Jul-2019	Kiselev G. A., Litvinova A. V.
	32	Khibiny, Russia	In the lower part of the birch crooked forest, H = 500 m	Jul-2019	Kiselev G. A., Litvinova A. V.
	33	Valley Ragusha, Leningrad region, Russia	Boreal forest	Jun-2019	Kiselev G. A.
	35	Lake Sobach'ye, Putorana Plateau, Russia	Coniferous forest	03-Aug-2018	Chinenko S. V.
	36	Lake Sobach'ye, Putorana Plateau, Russia	Mixed forest	20-Jul-2018	Chinenko S. V.
	41	Lake Kuznetskoe-To, Nenets Autonomous District, Russia	Tundra	26-Jul-2019	Lavrinenko O. V.
	42	Dolgiy Island, Nenets Autonomous District, Russia	Tundra	08-Aug-2019	Lavrinenko O. V.
	53	Yugyd va National Park, Russia	Mountains	Aug-2019	Kiselev G. A.
	54	Yugyd va National Park, Russia	Mountains	Aug-2019	Kiselev G. A.
V. uliginosum L.	2	Khibiny, Russia	Mountain tundra	Jul-2019	Antropov D. O.
	44	Lake Kuznetskoe-To, Nenets Autonomous District, Russia	Shrub-cladonia tundra	26-Jul-2019	Lavrinenko O. V.
	46	Dolgiy Island, Nenets Autonomous District, Russia	Tundra	09-Aug-2019	Lavrinenko O. V.
	47	Valley Anterola, Leningrad region, Russia	Swamp	2019	Antropov D. O.
	48	Yugyd va National Park, Russia	Swamp	Aug-2019	Antropov D. O.
	49	Yugyd va National Park, Russia	Tundra near the quarry	Aug-2019	Antropov D. O.
	50	Yugyd va National Park, Russia	Mountain tundra	Aug-2019	Antropov D. O.
	51	Yugyd va National Park, Russia	Mountain tundra	Aug-2019	Antropov D. O.
	55	Putorana Plateau, Russia	Valley lakeside forest	2019	Pospelov I. N., Pospelova E. B.
	57	Putorana Plateau, Russia	Shrub-sedge-lichen-moss tundra	2019	Pospelov I. N., Pospelova E. B.
	62	Khibiny, Russia	Shrub-moss tundra	08-Aug-2019	Koroleva N. E.
	63	Valley Tarasovo, Leningrad region, Russia	Pine forest	2019	Antropov D. O.
V. myrtillus L.	15	Mikhailovskoe, Pskov region, Russia	Taiga	04-Aug-2019	Sokornova S. V.
	17	Haute-Fagnes Nature Reserve, Belgium	Peat bog	16-Sep-2018	Kotlyar K. E.
	18	Haute-Fagnes Nature Reserve, Belgium	Peat bog	20-Oct-2018	Kotlyar K. E.
	19	Haute-Fagnes Nature Reserve, Belgium	Peat bog	20-Oct-2018	Kotlyar K. E.
	35	Ladoga, Russia	Pine forest	Jul-2021	Antropov D. O.
	41	Republic of Karelia, Russia	Pine forest	Aug-2022	Bogomaz O. D.
	42	Republic of Karelia, Russia	Pine forest	Aug-2022	Bogomaz O. D.
	100	Moscow region, Russia	Transitional swamp	Jul-2021	Bogomaz O. D.
V. ovalifolium Sm.	V7	Mustila, Finland	-	-	Russian Academy of Sciences Vladimir Komarov Botanical Institute's Botanical Garden of Peter the Great
V. smallii A. Gray	V9	Tallinn, Estonia	-	-	Russian Academy of Sciences Vladimir Komarov Botanical Institute's Botanical Garden of Peter the Great
V. emarginatum Hayata	V11	Taiwan	-	-	Russian Academy of Sciences Vladimir Komarov Botanical Institute's Botanical Garden of Peter the Great Specimen voucher: 242433
V. japonicum Miq.	V3	Botanical garden, Hokkaido, Japan	-	-	Russian Academy of Sciences Vladimir Komarov Botanical Institute's Botanical Garden of Peter the Great
V. myrtilloides Michx.	V5	Kalsnava, Latvia	-	-	Russian Academy of Sciences Vladimir Komarov Botanical Institute's Botanical Garden of Peter the Great
V. praestans Lamb.	V8	University botanical garden, Vilnius, Lithuania	-	-	Russian Academy of Sciences Vladimir Komarov Botanical Institute's Botanical Garden of Peter the Great
V. vulcanorum Kom.	V10	Western slope of the plateau Ushkovsky Dol Kamchatka, Russia	-	-	Russian Academy of Sciences Vladimir Komarov Botanical Institute's Botanical Garden of Peter the Great
V. conchophyllum Rehder.	V13	Vietnam	-	-	Russian Academy of Sciences Vladimir Komarov Botanical Institute's Botanical Garden of Peter the Great Specimen voucher: 242650
A. serpens Sleumer.	A1	Himalayas	-	-	Russian Academy of Sciences Vladimir Komarov Botanical Institute's Botanical Garden of Peter the Great Specimen voucher: 4904
