# Supplementary material for: Biodiversity of rolB/C-like Natural Transgene in the Genus Vaccinium L. and Its Application for Phylogenetic Studies
Source: Int J Mol Sci. 2023 Apr 8;24(8):6932. doi: 10.3390/ijms24086932 (PMC10138537; doi:10.3390/ijms24086932)
Supplement: Supplementary file 1 [file ijms-24-06932-s001.zip › Table S3.xlsx]

## Sheet: Лист1
Table S3.Description of data obtained from the SRA database.
These data were used for allele phasing
Run	Assay Type	BioSample	Center Name	Consent	DATASTORE filetype	DATASTORE provider	DATASTORE region	Experiment	Instrument	LibraryLayout	LibrarySelection	LibrarySource	Organism	Platform	Sample Name	SRA Study	AvgSpotLen	Bases	GB	Bytes	ReleaseDate	BioProject	Library Name	geo_loc_name_country	geo_loc_name_country_continent	BioSampleModel	geo_loc_name	Collection_Date	Lat_Lon	Host	Tissue	Cultivar	Isolate	Isolation_Source	Ecotype	env_broad_scale	dev_stage	env_local_scale	env_medium	Age	Replicate	STRAIN	isol_growth_condt	SAMPLE_TYPE	Sample_name	IsolateID	PlantID	samp_type	treatmentID
SRR8298006	WXS	SAMN10577364	MICHIGAN STATE UNIVERSITY	public	fastq,sra	s3	s3.us-east-1	SRX5112505	Illumina HiSeq 2500	PAIRED	size fractionation	GENOMIC	Vaccinium corymbosum	ILLUMINA	Blueberry_SG470	SRP169867	525	145487340724	86.96	86957540397	2018-12-11T00:00:00Z	PRJNA494180	Blueberry_SG470	USA	North America	Plant	USA				leaf	Draper					young
SRR8298002	WXS	SAMN10577362	MICHIGAN STATE UNIVERSITY	public	sra,fastq	s3	s3.us-east-1	SRX5112509	Illumina HiSeq 4000	PAIRED	size fractionation	GENOMIC	Vaccinium corymbosum	ILLUMINA	Bluberry_MP_8	SRP169867	298	77001146092	35.52	35523502460	2018-12-11T00:00:00Z	PRJNA494180	Bluberry_MP_8	USA	North America	Plant	USA				leaf	Draper					young
SRR7770668	RNA-Seq	SAMN09938100	GEO	public	fastq,sra	s3	s3.us-east-1	SRX4626123	Illumina HiSeq 2000	SINGLE	cDNA	TRANSCRIPTOMIC	Vaccinium myrtillus	ILLUMINA	GSM3362596	SRP159183	150	48843078900	31.18	31184445042	2020-02-20T00:00:00Z	PRJNA488632									mycorrhizal roots
SRR13376388	WGS	SAMN17131297	MICHIGAN STATE UNIVERSITY	public	fastq,sra	gs,s3	gs.US,s3.us-east-1	SRX9799747	Illumina NovaSeq 6000	PAIRED	unspecified	GENOMIC	Vaccinium macrocarpon	ILLUMINA	Cumberland_US99_79_31_1	SRP300747	297	73287937549	23.99	23988565490	2021-01-07T00:00:00Z	PRJNA687008	Cumberland_US99_79_31_1	USA	North America	Plant					leaf	Cumberland_US99_79_31_1
SRR13376387	WGS	SAMN17131298	MICHIGAN STATE UNIVERSITY	public	sra,fastq	s3,gs	gs.US,s3.us-east-1	SRX9799748	Illumina NovaSeq 6000	PAIRED	unspecified	GENOMIC	Vaccinium macrocarpon	ILLUMINA	Early_Black_US88_18_41_5	SRP300747	297	60566329552	20.73	20734637566	2021-01-07T00:00:00Z	PRJNA687008	Early_Black_US88_18_41_5	USA	North America	Plant					leaf	Early_Black_US88_18_41_5
SRR13376383	WGS	SAMN17131301	MICHIGAN STATE UNIVERSITY	public	sra,fastq	gs,s3	gs.US,s3.us-east-1	SRX9799752	Illumina NovaSeq 6000	PAIRED	unspecified	GENOMIC	Vaccinium macrocarpon	ILLUMINA	Lemunyon_US88_56_28_4	SRP300747	297	61222488585	20.14	20136473170	2021-01-07T00:00:00Z	PRJNA687008	Lemunyon_US88_56_28_4	USA	North America	Plant					leaf	Lemunyon_US88_56_28_4
SRR14876344	WGS	SAMN19762242	UNITED STATES DEPARTMENT OF AGRICULTURE-AGRICULTURAL RESEARCH SERVICE	public	fastq,sra	gs,s3	gs.US,s3.us-east-1	SRX11193687	Illumina NovaSeq 6000	PAIRED	RANDOM PCR	GENOMIC	Vaccinium oxycoccos	ILLUMINA	V. oxycoccos genome assembly	SRP324997	294	52510541629	17.25	17251901221	2021-06-22T00:00:00Z	PRJNA738865	Voxycoccos_WGS_ILL	USA	North America	Plant	USA: Alaska				leaf	NJ96-20					mature
SRR12686864	RNA-Seq	SAMN16191906	NANJING FORESTRY UNIVERSITY	public	sra,fastq	gs,s3	gs.US,s3.us-east-1	SRX9166817	HiSeq X Ten	PAIRED	RT-PCR	TRANSCRIPTOMIC	Vaccinium virgatum	ILLUMINA	Brightwell blueberry	SRP284419	300	29681812800	9.6	9604678834	2020-09-21T00:00:00Z	PRJNA664011	C15	China	Asia	Plant	China: experimental base of Baima district \, Nanjing city				fruit	Brightwell	Institute of Botany\, Jiangsu Province and Chinese Academy of Sciences		Conventional varieties		Stage 1			4 years
SRR12686860	RNA-Seq	SAMN16191906	NANJING FORESTRY UNIVERSITY	public	sra,fastq	s3,gs	s3.us-east-1,gs.US	SRX9166821	HiSeq X Ten	PAIRED	RT-PCR	TRANSCRIPTOMIC	Vaccinium virgatum	ILLUMINA	Brightwell blueberry	SRP284419	300	26973867300	8.83	8830697415	2020-09-21T00:00:00Z	PRJNA664011	A15	China	Asia	Plant	China: experimental base of Baima district \, Nanjing city				fruit	Brightwell	Institute of Botany\, Jiangsu Province and Chinese Academy of Sciences		Conventional varieties		Stage 1			4 years
SRR12691106	RNA-Seq	SAMN16237049	ANHUI NORMAL UNIVERSITY	public	sra,fastq	gs,s3	s3.us-east-1,gs.US	SRX9171062	Illumina HiSeq 2500	PAIRED	cDNA	TRANSCRIPTOMIC	Vaccinium ashei	ILLUMINA	blueberry_pink	SRP284710	297	15631763987	6.38	6384517963	2020-09-29T00:00:00Z	PRJNA664908	WGC090309R	China	Asia	Plant	China: Anhui				fruit	rabiteye					pink fruit				replicate=3
SRR12691103	RNA-Seq	SAMN16237048	ANHUI NORMAL UNIVERSITY	public	sra,fastq	s3,gs	gs.US,s3.us-east-1	SRX9171065	Illumina HiSeq 2500	PAIRED	cDNA	TRANSCRIPTOMIC	Vaccinium ashei	ILLUMINA	blueberry_blue	SRP284710	285	14561774086	5.94	5938812032	2020-09-28T00:00:00Z	PRJNA664908	WGC090306R	China	Asia	Plant	China: Anhui				fruit	rabiteye					blue fruit				replicate=3
SRR7523926	RNA-Seq	SAMN09661965	UNITED STATES DEPARTMENT OF AGRICULTURE-AGRICULTURAL RESEARCH SERVICE	public	sra,fastq	s3	s3.us-east-1	SRX4392476	Illumina HiSeq 2500	PAIRED	RANDOM	TRANSCRIPTOMIC	Vaccinium myrtillus	ILLUMINA	Vaccinium myrtillus untreated	SRP153766	300	11394424800	4.95	4953656946	2019-08-13T00:00:00Z	PRJNA481170	C2_1	Norway	Europe	Plant	Norway:Kaupanger				apical leaf	wild	untreated		wild		mature
SRR7523930	RNA-Seq	SAMN09661966	UNITED STATES DEPARTMENT OF AGRICULTURE-AGRICULTURAL RESEARCH SERVICE	public	sra,fastq	s3	s3.us-east-1	SRX4392472	Illumina HiSeq 2500	PAIRED	RANDOM	TRANSCRIPTOMIC	Vaccinium myrtillus	ILLUMINA	Vaccinium myrtillus MeJA treated	SRP153766	300	11191666200	4.85	4848023919	2019-08-13T00:00:00Z	PRJNA481170	T1_1	Norway	Europe	Plant	Norway:Kaupanger				apical leaf	wild	MeJA treated		wild		adult
SRR7523927	RNA-Seq	SAMN09661966	UNITED STATES DEPARTMENT OF AGRICULTURE-AGRICULTURAL RESEARCH SERVICE	public	sra,fastq	s3	s3.us-east-1	SRX4392475	Illumina HiSeq 2500	PAIRED	RANDOM	TRANSCRIPTOMIC	Vaccinium myrtillus	ILLUMINA	Vaccinium myrtillus MeJA treated	SRP153766	300	10632129300	4.56	4562926529	2019-08-13T00:00:00Z	PRJNA481170	T2_1	Norway	Europe	Plant	Norway:Kaupanger				apical leaf	wild	MeJA treated		wild		adult
SRR13349629	OTHER	SAMN16976414	CHONNAM NATIONAL UNIVERSITY	public	fastq,sra	s3,gs	gs.US,s3.us-east-1	SRX9775617	Illumina MiSeq	PAIRED	PCR	GENOMIC	Vaccinium japonicum	ILLUMINA	Vaccinium japonicum	SRP300234	302	8744712604	3.56	3556622217	2021-01-04T00:00:00Z	PRJNA681995	V.ja_Jeju	South Korea	Asia	Plant	South Korea				leaf				Jeju		flowering
SRR5799277	RNA-Seq	SAMN07305418	JILIN AGRICULTURAL UNIVERSITY	public	sra,fastq	s3	s3.us-east-1	SRX2978774	Illumina HiSeq 2000	PAIRED	RANDOM PCR	TRANSCRIPTOMIC	Vaccinium vitis-idaea	ILLUMINA	Vaccinium vitis-idaea white fruit transcriptome	SRP110973	180	4970697300	3.49	3490704344	2018-07-01T00:00:00Z	PRJNA392725	Vv-W	China	Asia	Plant	China: Jilin				fruit	Sunna					white fruit			6-year-old
SRR9010563	RNA-Seq	SAMN11572324	INSTITUTE OF BOTANY, JIANGSU PROVINCE AND CHINESE ACADEMY OF SCIENCES	public	fastq,sra	s3,gs	s3.us-east-1,gs.US	SRX5788721	Illumina HiSeq 2500	PAIRED	RT-PCR	TRANSCRIPTOMIC	Vaccinium ashei	ILLUMINA	Cup_3	SRP195316	300	10331842800	3.37	3365812807	2020-05-26T00:00:00Z	PRJNA541091	Cup_3	uncalculated	uncalculated	Plant	not applicable	2018-04			fruit	Brightwell	different riping stage of fruit				18DPA(day post anthesis)				biological replicate 3
SRR2057022	RNA-Seq	SAMN03762179	SWFC	public	fastq,sra	gs,s3	gs.US,s3.us-east-1	SRX1050052	Illumina HiSeq 2000	PAIRED	cDNA	TRANSCRIPTOMIC	Vaccinium dunalianum	ILLUMINA	RNA-SEQ of Vaccinium dunalianum Wight	SRP059165	180	4998376080	3.32	3323563045	2016-06-05T00:00:00Z	PRJNA285946		China	Asia	Plant	China:Wuding				bud				wide		bud
SRR15673719	RNA-Seq	SAMN21033714	ZHEJIANG A&F UNIVERSITY	public	fastq,sra	gs,s3	gs.US,s3.us-east-1	SRX11970172	Illumina HiSeq 2500	PAIRED	PCR	TRANSCRIPTOMIC	Vaccinium darrowii	ILLUMINA	Skin_rep2	SRP334811	279	9819055476	3.2	3196342374	2022-10-01T00:00:00Z	PRJNA758745	Skin_2_R1.fastq.gz	USA	North America	Plant	USA: Florida				Skin	Camp	Skin_rep2		V.darrowii		junior and adult			4-month and 2-year
SRR5799279	RNA-Seq	SAMN07305419	JILIN AGRICULTURAL UNIVERSITY	public	sra,fastq	s3	s3.us-east-1	SRX2978772	Illumina HiSeq 2000	PAIRED	RANDOM PCR	TRANSCRIPTOMIC	Vaccinium vitis-idaea	ILLUMINA	Vaccinium vitis-idaea red fruit transcriptome	SRP110973	180	4704434820	3.18	3175252225	2018-07-01T00:00:00Z	PRJNA392725	Vv-R	China	Asia	Plant	China: Jilin				fruit	Sunna					red fruit			6-year-old
SRR5799278	RNA-Seq	SAMN07305417	JILIN AGRICULTURAL UNIVERSITY	public	fastq,sra	s3	s3.us-east-1	SRX2978773	Illumina HiSeq 2000	PAIRED	RANDOM PCR	TRANSCRIPTOMIC	Vaccinium vitis-idaea	ILLUMINA	Vaccinium vitis-idaea green fruit transcriptome	SRP110973	180	4606427700	3.11	3105802907	2018-07-01T00:00:00Z	PRJNA392725	Vv-G	China	Asia	Plant	China: Jilin				fruit	Sunna					green fruit			6-year-old
SRR7686609	RNA-Seq	SAMN09810182	YANBIAN UNIVERSITY	public	fastq,sra	s3	s3.us-east-1	SRX4547104	Illumina HiSeq 2500	PAIRED	RANDOM PCR	TRANSCRIPTOMIC	Vaccinium uliginosum	ILLUMINA	T03	SRP157240	252	6460182540	2.82	2817127024	2019-09-11T00:00:00Z	PRJNA485591	blue fruits 3	China	Asia	Plant	China:Wangqing\, Jilin	2015-08-05	43.50 N 130.92 E		fruit		Blue-fruited Vaccinium uliginosum	none	not applicable		ripening fruits			not applicable	replicate * biological replicate 3			whole fruits
SRR7686610	RNA-Seq	SAMN09810183	YANBIAN UNIVERSITY	public	fastq,sra	s3	s3.us-east-1	SRX4547103	Illumina HiSeq 2500	PAIRED	RANDOM PCR	TRANSCRIPTOMIC	Vaccinium uliginosum	ILLUMINA	T04	SRP157240	252	6130839456	2.66	2663004310	2019-09-11T00:00:00Z	PRJNA485591	white fruits 1	China	Asia	Plant	China:Wangqing\, Jilin	2015-08-05	43.50 N 130.92 E		fruit		White-fruited Vaccinium uliginosum	none	not applicable		ripening fruits			not applicable	replicate * biological replicate 1			whole fruits
SRR7768528	RNA-Seq	SAMN09925650	SOUTHWEST FORESTRY UNIVERSITY	public	sra,fastq	s3	s3.us-east-1	SRX4624116	Illumina HiSeq 2000	PAIRED	Oligo-dT	TRANSCRIPTOMIC	Vaccinium dunalianum	ILLUMINA	B2	SRP159131	300	7136159700	2.64	2642432976	2018-08-30T00:00:00Z	PRJNA488316	B2	China	Asia	Plant	China:kunming				flower	Vaccinium dunalianum					bud
SRR17459400	RNA-Seq	SAMN24663522	ANHUI NORMAL UNIVERSITY	public	sra,fastq	s3,gs	gs.US,s3.us-east-1	SRX13630602	Illumina NovaSeq 6000	PAIRED	PCR	TRANSCRIPTOMIC	Vaccinium bracteatum	ILLUMINA	Vaccinium bracteatum_green_fruit	SRP353709	299	7024223857	2.4	2396183686	2022-01-06T00:00:00Z	PRJNA794927	fruit6	China	Asia	Plant	China: Wuhu				green_fruit	V. bracteatum					young leaves				biological replicate 2
SRR17459408	RNA-Seq	SAMN24663523	ANHUI NORMAL UNIVERSITY	public	sra,fastq	s3,gs	gs.US,s3.us-east-1	SRX13630594	Illumina NovaSeq 6000	PAIRED	PCR	TRANSCRIPTOMIC	Vaccinium bracteatum	ILLUMINA	Vaccinium bracteatum_leaf_for_transcriptome	SRP353709	298	7030610064	2.38	2383202140	2022-01-06T00:00:00Z	PRJNA794927	leaf2	China	Asia	Plant	China: Wuhu				leaf	V. bracteatum					young leaves				biological replicate 3
SRR17459403	RNA-Seq	SAMN24663521	ANHUI NORMAL UNIVERSITY	public	sra,fastq	s3,gs	s3.us-east-1,gs.US	SRX13630599	Illumina NovaSeq 6000	PAIRED	PCR	TRANSCRIPTOMIC	Vaccinium bracteatum	ILLUMINA	Vaccinium bracteatum_blue_fruit	SRP353709	299	6985009459	2.37	2365951853	2022-01-06T00:00:00Z	PRJNA794927	fruit3	China	Asia	Plant	China: Wuhu				blue_fruit	V. bracteatum					young leaves				biological replicate 2
SRR13865261	RNA-Seq	SAMN18163712	HULSE-KEMPLAB	public	sra,fastq	s3,gs	gs.US,s3.us-east-1	SRX10245788	Illumina NovaSeq 6000	PAIRED	RANDOM	TRANSCRIPTOMIC	Vaccinium darrowii	ILLUMINA	S-14	SRP309487	300	7599758700	2.36	2364767961	2021-11-18T00:00:00Z	PRJNA706655	S_14	USA	North America	Plant	USA:Mississippi	2019-06-10			berry	NJ8810/NJ8807					Ripening				biological replicate 2
ERR5529691	WGS	SAMEA8202058	GSC	public	sra,fastq	gs,s3,ncbi	gs.US,ncbi.public,s3.us-east-1	ERX5310152	Illumina HiSeq 2000	PAIRED	RANDOM	GENOMIC	Vaccinium oxycoccos	ILLUMINA	SAMEA8202058	ERP127839	200	1655924978	1.24	1241979584	2021-09-26T00:00:00Z	PRJEB43865	BMB_HN_W	Norway	Europe			1991-07-03																	TROM_V_856
These data were used to search for the gene, but was not used for further analysis due to low coverage
Run	Organism
SRR19354234	Vaccinium schoddei
SRR19354284	Vaccinium striicaule
SRR19354449	Vaccinium wollastonii
SRR19354562	Vaccinium scoparium
SRR19354596	Vaccinium whitmeei
SRR19354685	Vaccinium selerianum
SRR19354803	Vaccinium stamineum
SRR19354815	Vaccinium stenophyllum
SRR19355084	Vaccinium wrightii
SRR19401143	Vaccinium whitmeei
SRR19401392	Vaccinium symplocifolium
SRR19401430	Vaccinium selerianum
SRR19402176	Vaccinium shastense
SRR19402188	Vaccinium vidalii
SRR19405867	Vaccinium vidalii
SRR19908717	Vaccinium stamineum
SRR19400792	Vaccinium yatabei
SRR19400793	Vaccinium smallii
SRR19401324	Vaccinium wollastonii
SRR19401400	Vaccinium schoddei
SRR19401421	Vaccinium stanleyi
SRR19401435	Vaccinium talamancense
SRR19401493	Vaccinium stamineum
SRR19401505	Vaccinium elvirae
SRR19401672	Vaccinium wrightii
SRR19908712	Vaccinium tenellum
This data was used to search for the gene in whole genomes
BioProject	Organism
PRJNA706655	Vaccinium darrowii
[truncated: 98 more columns]
